# Supplementary material for: Inferring cluster-based networks from differently stimulated multiple time-course gene expression data
Source: PubMed Central journal article supplement — Bioinformatics. 2010 Mar 11;26(8):1073–81. doi: 10.1093/bioinformatics/btq094 (PMC2853688; doi:10.1093/bioinformatics/btq094), 2010-03-11
Supplement: btq094_2.pdf [file btq094_2.pdf]

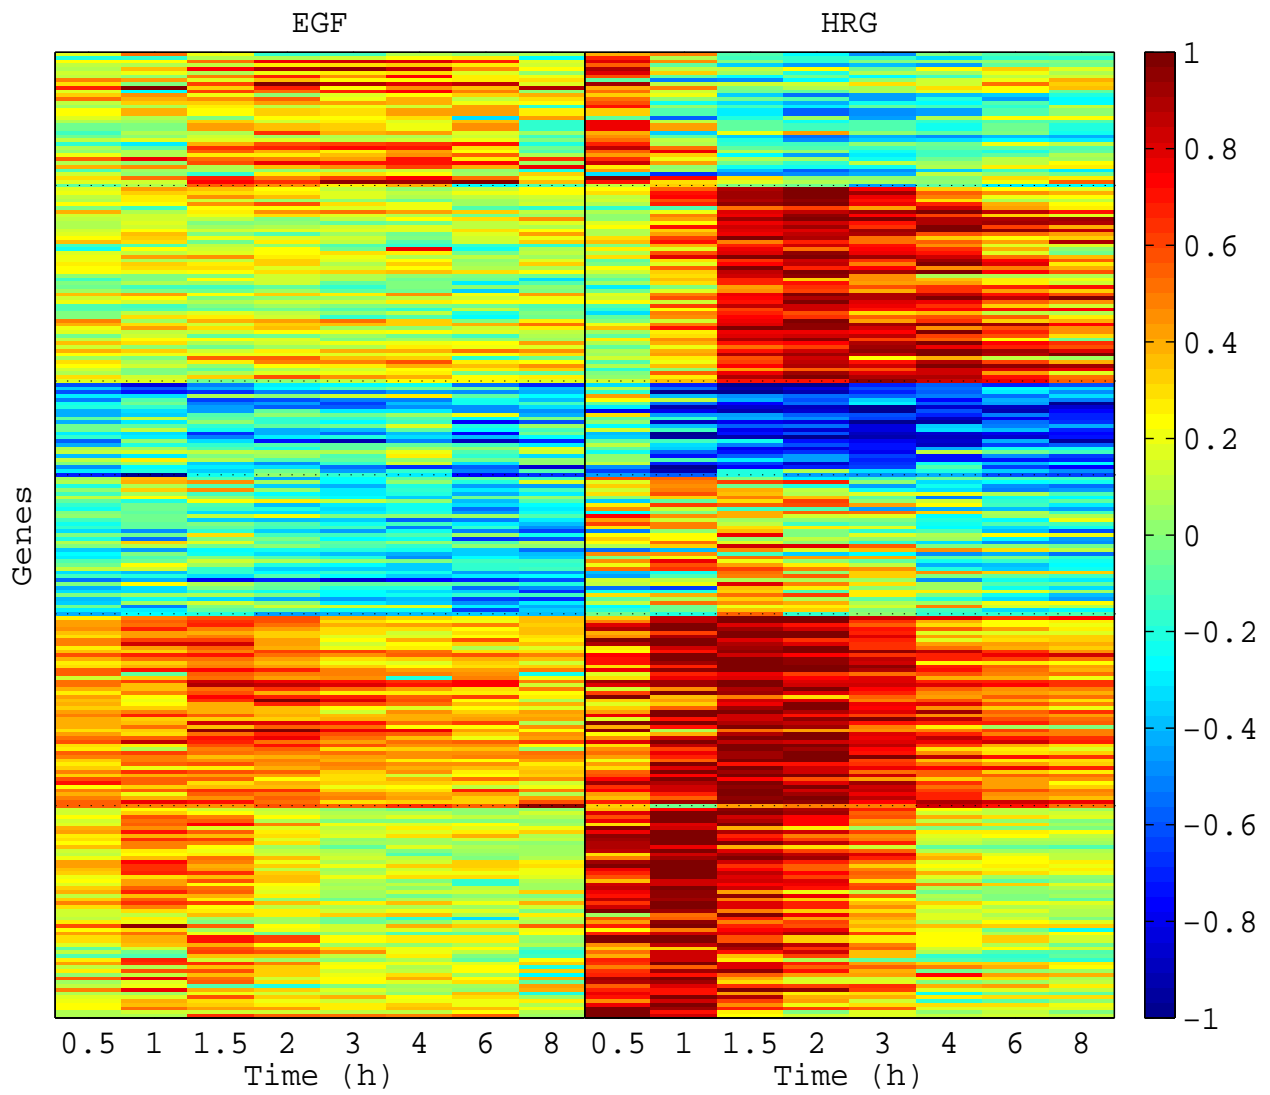

**Supplementary Figure 1:** Clustered temporal gene expression profiles in MCF7 cell stimulated via EGF or HRG. Each cluster is divided by dotted lines.
